# Supplementary material
Source: PubMed Central journal article supplement (PMC6528806)
Supplement: NIHMS1024410-supplement-1.pdf [file NIHMS1024410-supplement-1.pdf]

## Supplementary Information

### **Solid-to-fluid DNA transition inside HSV-1 capsid close to the temperature of infection**

Udom Sae-Ueng<sup>†1</sup>, Dong Li<sup>†1</sup>, Xiaobing Zuo<sup>2</sup>, Jamie B. Huffman<sup>3</sup>, Fred L. Homa<sup>3</sup>, Donald Rau<sup>4</sup>, and Alex Evilevitch<sup>\*1,5</sup>

*1. Carnegie Mellon University, Department of Physics, Pittsburgh, PA 15213, USA*

*2. X-ray Science Division, Advanced Photon Source, Argonne National Laboratory, Argonne, IL 60439, USA*

*3. Department of Microbiology and Molecular Genetics, University of Pittsburgh School of Medicine, Pittsburgh, Pennsylvania 15260 USA.*

*4. Lab of Physical & Structural Biology, Program in Physical Biology, National Institutes of Health, Bethesda, MD 20892, USA*

*5. Lund University, Department of Biochemistry and Structural Biology, Box 124, Lund, Sweden*

† - authors contributed equally to this work

\* corresponding author: alexe@cmu.edu

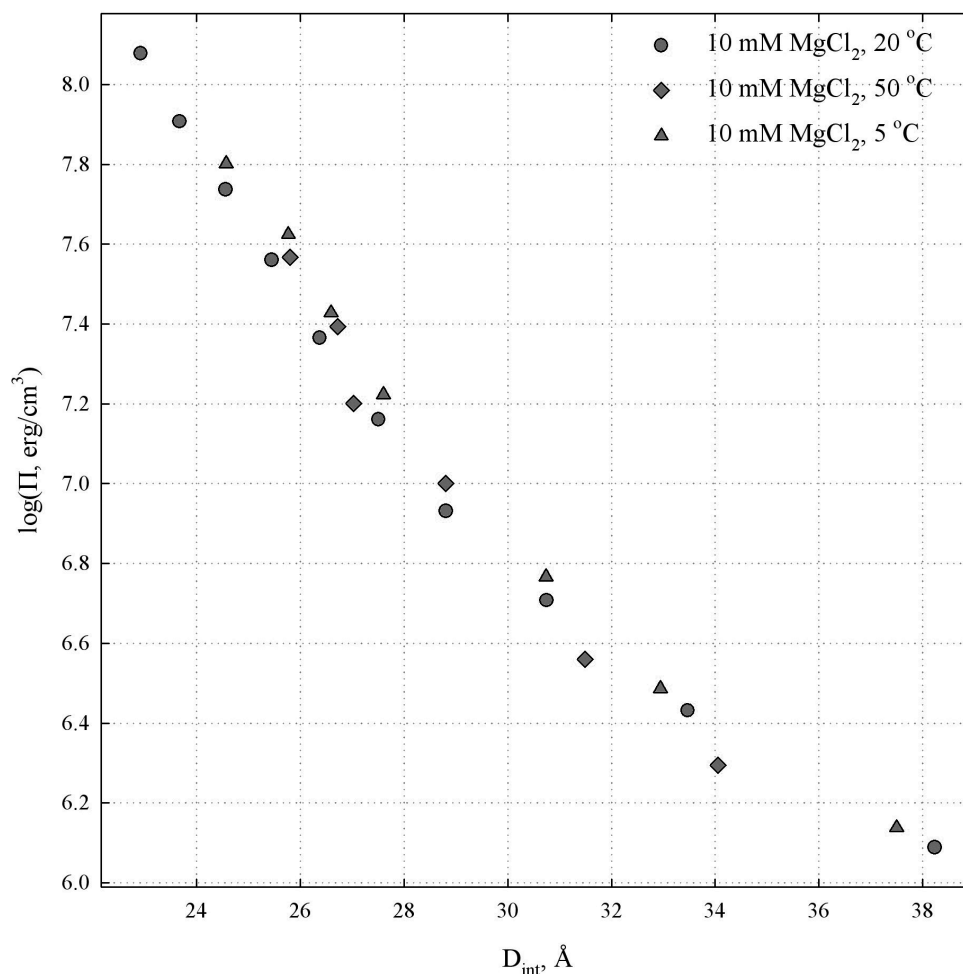

**Supplementary Figure 1:** Comparison of intermolecular force curves ( $\log_{10}$  of PEG osmotic pressure,  $P$ , versus interhelical DNA-DNA spacing,  $D_{int}$ ) measured for helices in 10 mM  $MgCl_2$  Tris-buffer at 5, 20 and 50°C.

The osmotic stress technique for measuring forces is described in ref.<sup>1</sup> (see below). Force measurements were carried out at the Laboratory of Physical and Structural Biology, Program in Physical Biology, National Institutes of Health. Ni-filtered Cu-K $\alpha$  radiation from an UltraBright microfocus x-ray source from Oxford Instruments equipped with polycapillary focusing x-ray optics was used for the small angle x-ray scattering (SAXS) experiments. The primary beam was also collimated by a set of slits. After equilibration, samples were sealed with ~ 100 ml equilibrating salt-PEG solution in a sample cell and mounted into a temperature-controlled holder. The flight path between the sample and detector, ~ 16 cm, was helium filled. Typical exposure times were ~ 30 min. Further details are described elsewhere<sup>2</sup>.

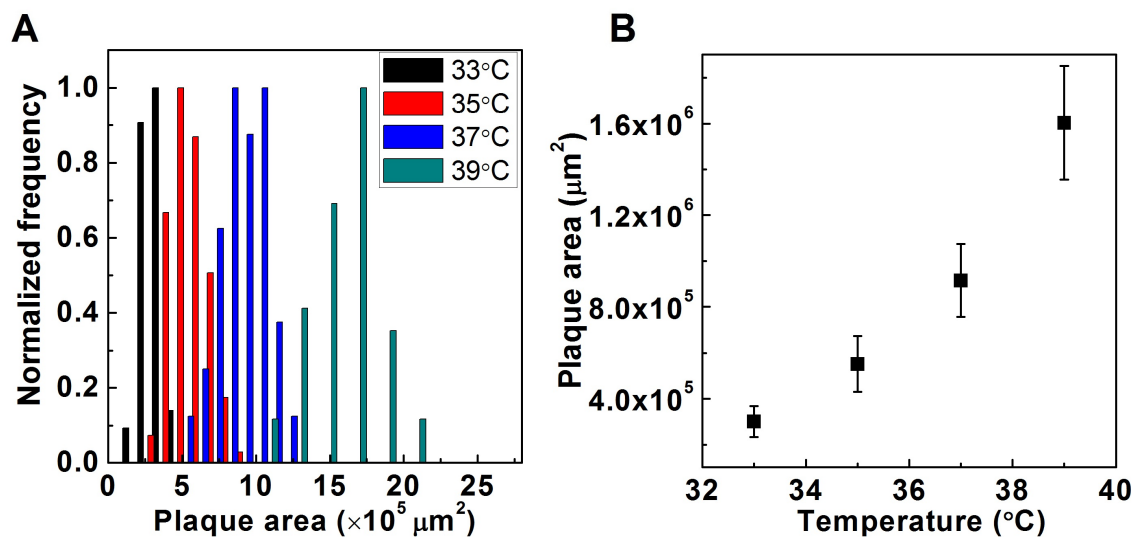

**Supplementary Figure 2:** (A) Distributions of plaque area formed on a layer of Vero cells at incubation temperatures from 33°C to 39°C. Plaques were measured after 75 h for all samples. The plaque area is associated with the rate of infection spread of HSV-1 at each temperature. (B) The averaged plaque area is plotted as a function of incubation temperature. At least 300 plaques were analyzed for each sample. Error bars show the standard deviation.

#### References:

1. Parsegian, V.A., Rand, R.P., Fuller, N.L. & Rau, D.C. Osmotic-Stress for the Direct Measurement of Intermolecular Forces. *Methods in Enzymology* **127**, 400-416 (1986).
2. DeRouchey, J., Hoover, B. & Rau, D.C. A comparison of DNA compaction by arginine and lysine peptides: a physical basis for arginine rich protamines. *Biochemistry* **52**, 3000-9 (2013).
